# Supplementary material for: Characterizing the composition, metabolism and physiological functions of the fatty liver in Rana omeimontis tadpoles
Source: Front Zool. 2019 Nov 14;16:42. doi: 10.1186/s12983-019-0341-x (PMC6854647; doi:10.1186/s12983-019-0341-x)
Supplement: Supplementary file 2 — Additional file 2. Numeric data used in graphs. [file 12983_2019_341_MOESM2_ESM.xlsx]

## Sheet: Figure 3B
20oC		8oC
Time	Liver weight	Time	Liver weight
0 days	18.4	0 days	18.4
0 days	20.8	0 days	20.8
0 days	14.4	0 days	14.4
0 days	14.3	0 days	14.3
0 days	19.9	0 days	19.9
0 days	23.1	0 days	23.1
0 days	17.4	0 days	17.4
0 days	17.5	0 days	17.5
0 days	15.7	0 days	15.7
2 days	21.1	2 days	15.6
2 days	10.7	2 days	16.4
2 days	15.4	2 days	19
2 days	15.7	2 days	23.2
2 days	16.6	2 days	15.2
2 days	12.3	2 days	13.3
2 days	14.5	2 days	18.7
2 days	12.2	2 days	12.4
5 days	9.2	8 days	27.1
5 days	10.1	8 days	14.8
5 days	13.3	8 days	16
5 days	9	8 days	15.3
5 days	10	8 days	19.6
5 days	10.9	8 days	12.9
5 days	12.9	8 days	15.8
5 days	12.1	8 days	16.9
10 days	4.6	30 days	8.5
10 days	8.9	30 days	11.6
10 days	6.1	30 days	14.7
10 days	8	30 days	10.9
10 days	5	30 days	9.3
10 days	4.5	30 days	14.1
10 days	9.7
10 days	5.7

## Sheet: Figure 3C
20oC			8oC
Time days	Protein weight mg	Liver weight mg	Time days	Protein weight mg	Liver weight mg
0 days	1.34483	12.5	0 days	1.34483	12.5
0 days	1.86207	18.6	0 days	1.86207	18.6
0 days	1.91954	18.7	0 days	1.91954	18.7
0 days	2.14943	32.1	0 days	2.14943	32.1
0 days	1.63218	15.2	0 days	1.63218	15.2
0 days	2.49425	33.7	0 days	2.49425	33.7
0 days	2.09195	18.2	0 days	2.09195	18.2
0 days	3.12644	33.1	0 days	3.12644	33.1
0 days	1.86207	24	0 days	1.86207	24
0 days	2.03448	22.7	0 days	2.03448	22.7
0 days	1.57471	15.8	0 days	1.57471	15.8
0 days	1.45977	13.8	0 days	1.45977	13.8
0 days	1.22989	12.4	0 days	1.22989	12.4
2 days	1.63218	21.1	2 days	1.34309	15.6
2 days	1.28736	10.7	2 days	1.47606	16.4
2 days	1.57471	15.4	2 days	1.43174	19
2 days	1.51724	15.7	2 days	1.65337	23.2
2 days	1.45977	16.6	2 days	1.0328	15.2
2 days	1.57471	12.3	2 days	1.47606	13.3
2 days	1.63218	14.5	2 days	1.6977	18.7
2 days	1.28736	12.2	2 days	1.21011	12.4
5 days	0.885057	9.2	8 days	2.09663	27.1
5 days	1	10.1	8 days	1.43174	14.8
5 days	1.34483	13.3	8 days	1.60904	16
5 days	1.22989	9	8 days	2.22961	15.3
5 days	1.17241	10	8 days	1.78635	19.6
5 days	1.4023	10.9	8 days	1.56472	12.9
5 days	1.51724	12.9	8 days	1.65337	15.8
5 days	2.09195	12.1	8 days	1.96365	16.9
10 days	0.482759	4.6	30 days	0.899823	8.5
10 days	0.827586	8.9	30 days	1.16578	11.6
10 days	0.597701	6.1	30 days	1.65337	14.7
10 days	0.770115	8	30 days	1.12145	10.9
10 days	1.51724	5	30 days	1.07713	9.3
10 days	0.597701	4.5	30 days	1.38741	14.1
10 days	0.885057	9.7
10 days	0.942529	5.7

## Sheet: Figure 3D
20oC			8oC
Time days	Protein weight mg	Liver weight mg	Time days	Protein weight mg	Liver weight mg
0 days	0.005799	12.5	0 days	0.005799	12.5
0 days	0.193257	18.6	0 days	0.193257	18.6
0 days	0.063732	18.7	0 days	0.063732	18.7
0 days	0.525155	32.1	0 days	0.525155	32.1
0 days	0.044107	15.2	0 days	0.044107	15.2
0 days	0.245538	33.7	0 days	0.245538	33.7
0 days	0.078019	18.2	0 days	0.078019	18.2
0 days	0.262494	33.1	0 days	0.262494	33.1
0 days	0.150239	24	0 days	0.150239	24
0 days	0.214138	22.7	0 days	0.214138	22.7
0 days	0.030762	15.8	0 days	0.030762	15.8
0 days	0.052742	13.8	0 days	0.052742	13.8
0 days	0.009724	12.4	0 days	0.009724	12.4
2 days	0.121037	21.1	2 days	0.055705	15.6
2 days	0.163741	10.7	2 days	0.09076	16.4
2 days	0.049602	15.4	2 days	0.0567025	19
2 days	0.179598	15.7	2 days	0.134793	23.2
2 days	0.200636	16.6	2 days	0.059125	15.2
2 days	0.01726	12.3	2 days	0.0527125	13.3
2 days	0.049759	14.5	2 days	0.070525	18.7
2 days	0.04395	12.2	2 days	0.0330475	12.4
5 days	0.025267	9.2	8 days	0.154173	27.1
5 days	0.00941	10.1	8 days	0.05314	14.8
5 days	0.031547	13.3	8 days	0.095605	16
5 days	0.00941	9	8 days	0.0624025	15.3
5 days	0.005799	10	8 days	0.07822	19.6
5 days	0.007369	10.9	8 days	0.04801	12.9
5 days	0.031704	12.9	8 days	0.109428	15.8
5 days	0.029349	12.1	8 days	0.09589	16.9
10 days	0.001089	4.6	30 days	0.0064	8.5
10 days	0.005014	8.9	30 days	0.0242125	11.6
10 days	0.000461	6.1	30 days	0.0535675	14.7
10 days	0.02511	8	30 days	0.0113875	10.9
10 days	0.010352	5	30 days	0.0091075	9.3
10 days	0.007055	4.5	30 days	0.0943225	14.1
10 days	0.031861	9.7
10 days	0.004543	5.7

## Sheet: Figure 3E
20oC			8oC
Time days	Protein weight mg	Liver weight mg	Time days	Protein weight mg	Liver weight mg
0 days	0.823518	12.5	0 days	0.823518	12.5
0 days	0.913031	18.6	0 days	0.913031	18.6
0 days	0.784729	18.7	0 days	0.784729	18.7
0 days	0.554979	32.1	0 days	0.554979	32.1
0 days	0.429661	15.2	0 days	0.429661	15.2
0 days	0.993592	33.7	0 days	0.993592	33.7
0 days	0.495304	18.2	0 days	0.495304	18.2
0 days	0.39684	33.1	0 days	0.39684	33.1
0 days	0.596752	24	0 days	0.596752	24
0 days	0.742956	22.7	0 days	0.742956	22.7
0 days	0.429661	15.8	0 days	0.429661	15.8
0 days	0.671346	13.8	0 days	0.671346	13.8
0 days	0.313295	12.4	0 days	0.313295	12.4
0 days	0.331197	8.8	0 days	0.331197	8.8
2 days	0.346116	21.1	2 days	0.585164	15.6
2 days	0.438613	10.7	2 days	0.410719	16.4
2 days	0.369986	15.4	2 days	0.472547	19
2 days	0.605703	15.7	2 days	0.77065	23.2
2 days	0.60272	16.6	2 days	0.488004	15.2
2 days	0.525142	12.3	2 days	0.618286	13.3
2 days	0.375954	14.5	2 days	0.677907	18.7
2 days	0.510223	12.2	2 days	0.468131	12.4
5 days	0.232733	9.2	8 days	1.1085	27.1
5 days	0.244668	10.1	8 days	0.618286	14.8
5 days	0.307327	13.3	8 days	0.512294	16
5 days	0.295392	9	8 days	0.715446	15.3
5 days	0.262571	10	8 days	0.450466	19.6
5 days	0.22975	10.9	8 days	0.439425	12.9
5 days	0.364019	12.9	8 days	0.56529	15.8
5 days	0.30136	12.1	8 days	0.832478	16.9
10 days	0.0835453	4.6	30 days	0.543209	8.5
10 days	0.134269	8.9	30 days	0.333433	11.6
10 days	0.086529	6.1	30 days	0.474756	14.7
10 days	0.182009	8	30 days	0.591788	10.9
10 days	0.0238701	5	30 days	0.3246	9.3
10 days	0.0358051	4.5	30 days	0.748568	14.1
10 days	0.170074	9.7
10 days	0.0895128	5.7

## Sheet: Figure 9A-E
Sufficiently fed						Insufficiently fed
Body weight mg	Liver weight mg	Tail weight mg	HSI	HTI	Time	Body weight mg	Liver weight mg	Tail weight mg	HSI	HTI	Time
400.4	18.4	123.8	0.045954	0.148627	0 days	448.2	11.7	136.3	0.0261044	0.0858401	0 days
377.8	20.8	117.7	0.0550556	0.17672	0 days	406.1	13.3	123.7	0.0327506	0.107518	0 days
311.7	14.4	91.1	0.0461983	0.158068	0 days	335.5	9	101.6	0.0268256	0.0885827	0 days
295.6	14.3	83.7	0.0483762	0.170848	0 days	398.9	9.7	121.2	0.0243169	0.080033	0 days
400	19.9	113.8	0.04975	0.174868	0 days	481.6	15.4	135	0.0319767	0.114074	0 days
367	23.1	119.4	0.0629428	0.193467	0 days	268.3	6	95.3	0.022363	0.0629591	0 days
380.2	17.4	109.5	0.0457654	0.158904	0 days	401.9	13	129.6	0.0323464	0.100309	0 days
398.3	17.5	113.6	0.0439367	0.154049	0 days	397	9.2	128.4	0.0231738	0.0716511	0 days
321.9	15.7	85.6	0.0487729	0.183411	0 days	266.6	4.7	80.2	0.0176294	0.0586035	0 days
378.3	21.1	116	0.0557758	0.181897	2 days	306	7.6	92	0.0248366	0.0826087	0 days
303	10.7	84.9	0.0353135	0.126031	2 days	388.9	7.5	84.8	0.0192852	0.0884434	0 days
300.6	15.4	87.3	0.0512309	0.176403	2 days	299	8	100	0.0267559	0.08	0 days
370.7	15.7	120.3	0.0423523	0.130507	2 days	317.7	12.1	110.1	0.0380862	0.1099	0 days
326.2	16.6	106.2	0.050889	0.156309	2 days	360.1	12.1	117.1	0.0336018	0.10333	0 days
294.7	12.3	86.9	0.0417374	0.141542	2 days	284.5	7	77.5	0.0246046	0.0903226	2 days
337.5	14.5	96.5	0.042963	0.150259	2 days	323.7	7.6	98.4	0.0234785	0.0772358	2 days
274.3	12.2	86	0.0444769	0.14186	2 days	364	9.2	113.9	0.0252747	0.0807726	2 days
274.6	9.2	78.3	0.0335033	0.117497	5 days	276.5	6	90.6	0.0216998	0.0662252	2 days
204	10.1	62.4	0.0495098	0.161859	5 days	293.1	7.5	93.9	0.0255885	0.0798722	2 days
279.2	13.3	97.1	0.0476361	0.136972	5 days	314.2	7.4	97.3	0.0235519	0.0760534	2 days
191.5	9	64.6	0.0469974	0.139319	5 days	427.9	11.9	147	0.0278102	0.0809524	2 days
274.9	10	89.2	0.0363769	0.112108	5 days	271.2	5.5	88.3	0.0202802	0.0622877	2 days
244.3	10.9	80.7	0.0446173	0.135068	5 days	353.2	7.4	96	0.0209513	0.0770833	5 days
260.6	12.9	91.4	0.0495012	0.141138	5 days	393.3	10.6	117.5	0.0269514	0.0902128	5 days
268.7	12.1	73	0.0450316	0.165753	5 days	261.4	5.4	76	0.020658	0.0710526	5 days
220.9	4.6	63.2	0.0208239	0.0727848	10 days	315.4	6	92.6	0.0190235	0.0647948	5 days
293.5	8.9	86.3	0.0303237	0.103129	10 days	264.7	6	76.4	0.0226672	0.078534	5 days
259.2	6.1	78.5	0.023534	0.077707	10 days	475.7	12.1	138.3	0.0254362	0.087491	5 days
299.3	8	85.1	0.026729	0.0940071	10 days	360.1	7.3	115.7	0.0202721	0.0630942	5 days
281.4	5	91.1	0.0177683	0.0548847	10 days	310.5	5.2	96.5	0.0167472	0.053886	5 days
245	4.5	71.4	0.0183673	0.0630252	10 days	240.6	6.8	76.7	0.0282627	0.0886571	5 days
264.9	9.7	75.8	0.0366176	0.127968	10 days	297.9	6.8	93.5	0.0228265	0.0727273	5 days
247.7	5.7	81.5	0.0230117	0.0699387	10 days	265.8	5.2	74.7	0.0195636	0.0696118	5 days
						343.4	6.8	111.3	0.019802	0.0610961	10 days
						261.6	3.1	80.4	0.0118502	0.0385572	10 days
						366.7	7.1	122.9	0.0193619	0.0577705	10 days
						275.3	3.8	83.2	0.0138031	0.0456731	10 days
						275.6	3.3	84.9	0.0119739	0.0388693	10 days
						311.7	4.3	92.6	0.0137953	0.0464363	10 days
						270.9	4.6	81	0.0169804	0.0567901	10 days
						276.6	4.5	88.1	0.016269	0.0510783	10 days
						305.4	4.9	90.4	0.0160445	0.0542035	10 days
						258.4	3.4	84.1	0.0131579	0.0404281	10 days
						276.7	3	80	0.0108421	0.0375	10 days
						300.6	3.4	104.2	0.0113107	0.0326296	10 days
						333.9	4.9	100.8	0.0146751	0.0486111	10 days
						286.9	3.3	100.6	0.0115023	0.0328032	10 days
						264.1	3.2	89.5	0.0121166	0.0357542	10 days
						281.2	3.6	83	0.0128023	0.0433735	10 days

## Sheet: Figure 9F-J
Sufficiently fed						Insufficiently fed
Body weight mg	Liver weight mg	Tail weight mg	HSI	HTI	Time days	Body weight mg	Liver weight mg	Tail weight mg	HSI	HTI	Time days
400.4	18.4	123.8	0.045954	0.148627	0 days	448.2	11.7	136.3	0.0261044	0.0858401	0 days
377.8	20.8	117.7	0.0550556	0.17672	0 days	406.1	13.3	123.7	0.0327506	0.107518	0 days
311.7	14.4	91.1	0.0461983	0.158068	0 days	335.5	9	101.6	0.0268256	0.0885827	0 days
295.6	14.3	83.7	0.0483762	0.170848	0 days	398.9	9.7	121.2	0.0243169	0.080033	0 days
400	19.9	113.8	0.04975	0.174868	0 days	481.6	15.4	135	0.0319767	0.114074	0 days
367	23.1	119.4	0.0629428	0.193467	0 days	268.3	6	95.3	0.022363	0.0629591	0 days
380.2	17.4	109.5	0.0457654	0.158904	0 days	401.9	13	129.6	0.0323464	0.100309	0 days
398.3	17.5	113.6	0.0439367	0.154049	0 days	397	9.2	128.4	0.0231738	0.0716511	0 days
321.9	15.7	85.6	0.0487729	0.183411	0 days	266.6	4.7	80.2	0.0176294	0.0586035	0 days
380.8	15.6	116.5	0.0409664	0.133906	2 days	306	7.6	92	0.0248366	0.0826087	0 days
386.3	16.4	112.9	0.0424541	0.145261	2 days	388.9	7.5	84.8	0.0192852	0.0884434	0 days
415.9	19	102.6	0.0456841	0.185185	2 days	299	8	100	0.0267559	0.08	0 days
421.6	23.2	111.4	0.0550285	0.208259	2 days	317.7	12.1	110.1	0.0380862	0.1099	0 days
248.7	15.2	65	0.0611178	0.233846	2 days	360.1	12.1	117.1	0.0336018	0.10333	0 days
361.5	13.3	88.7	0.0367911	0.149944	2 days	351	10	107.1	0.02849	0.0933707	2 days
402.8	18.7	98.1	0.046425	0.190622	2 days	365.8	6.8	99.2	0.0185894	0.0685484	2 days
360.1	12.4	102.3	0.0344349	0.121212	2 days	380.9	10.6	109.2	0.0278288	0.0970696	2 days
389	27.1	115.1	0.0696658	0.235447	8 days	297.6	6.2	88.8	0.0208333	0.0698198	2 days
299.1	14.8	87.8	0.0494818	0.168565	8 days	343.2	6	103.8	0.0174825	0.0578035	2 days
299.5	16	76.5	0.0534224	0.20915	8 days	398	12	123	0.0301508	0.097561	2 days
350.8	15.3	115.9	0.0436146	0.13201	8 days	288.5	6.6	75.7	0.0228769	0.0871863	2 days
395.2	19.6	124.9	0.0495951	0.156926	8 days	317.2	6.4	97.4	0.0201765	0.0657084	2 days
293.5	12.9	79.8	0.0439523	0.161654	8 days	294.1	6.9	88	0.0234614	0.0784091	2 days
332.4	15.8	103.5	0.0475331	0.152657	8 days	310.9	8	95.5	0.0257317	0.0837696	2 days
374.1	16.9	117.6	0.0451751	0.143707	8 days	272.3	5.9	86.1	0.0216673	0.068525	2 days
208.8	8.5	51.6	0.0407088	0.164729	30 days	339.1	9	100.7	0.0265408	0.0893744	2 days
265.5	11.6	72.2	0.0436911	0.160665	30 days	299.2	5.2	83	0.0173797	0.0626506	8 days
350.3	14.7	82.8	0.041964	0.177536	30 days	304.2	10.2	80.3	0.0335306	0.127024	8 days
305.1	10.9	88.7	0.035726	0.122886	30 days	303.2	6.2	89.2	0.0204485	0.0695067	8 days
247.5	9.3	86.3	0.0375758	0.107764	30 days	283.8	6.7	93.4	0.0236082	0.0717345	8 days
320.6	14.1	87.7	0.04398	0.160775	30 days	414.7	9.9	120.3	0.0238727	0.0822943	8 days
						327.1	11.8	89	0.0360746	0.132584	8 days
						328	6	101.5	0.0182927	0.0591133	8 days
						261	7.2	71.7	0.0275862	0.100418	8 days
						327.1	7.5	114.5	0.0229288	0.0655022	8 days
						365	6.8	120.1	0.0186301	0.0566195	8 days
						356.5	8.6	109.5	0.0241234	0.0785388	8 days
						259.4	3.6	81.8	0.0138782	0.0440098	30 days
						295.1	5	99.8	0.0169434	0.0501002	30 days
						426.2	10.6	146.7	0.024871	0.0722563	30 days
						287.9	5.6	99.4	0.0194512	0.056338	30 days
						313.8	5.8	106.2	0.0184831	0.0546139	30 days
						339.6	7.4	114.9	0.0217903	0.0644038	30 days
						306.6	6.1	90.7	0.0198956	0.0672547	30 days
						269.5	4.1	100.9	0.0152134	0.0406343	30 days
						331.1	5.1	118.7	0.0154032	0.0429655	30 days
						290.7	5.9	101	0.0202958	0.0584158	30 days
						238.4	3.3	85.2	0.0138423	0.0387324	30 days
						275.4	5.6	93.4	0.0203341	0.0599572	30 days
						314.4	4.6	102.7	0.014631	0.0447907	30 days
						338.2	5.8	102.4	0.0171496	0.0566406	30 days
						252.7	4.9	78.4	0.0193906	0.0625	30 days
						296	4.1	106.8	0.0138514	0.0383895	30 days
